# Supplementary material for: Magnetic and spectroscopic properties of Ni–Zn–Al ferrite spinel: from the nanoscale to microscale
Source: Royal Society of Chemistry journal article supplement (doi:10.1039/d0ra05522k), 2020-01-01
Supplement: d0ra05522k1.pdf [file d0ra05522k1.pdf]

# Electronic Supporting Information

## Magnetic and spectroscopic properties of Ni-Zn-Al ferrite spinel: from the nanoscale to microscale

Jalel. Massoudi<sup>1,\*</sup>, Mourad. Smari<sup>1,2</sup>, Kamel. Nouri<sup>3</sup>, Essebti. Dhahri<sup>1</sup>, Kamel. Khirouni<sup>4</sup>,  
Sylvain. Bertaina<sup>5</sup>, Lotfi. Bessais<sup>3</sup> and El.Kebir. Hlil<sup>6</sup>

<sup>1</sup>Laboratoire de Physique Appliquée, Faculté des Sciences, Université de Sfax, B.P. 1171, Sfax 3000, Tunisia

<sup>2</sup>CICECO, Aveiro Institute of Materials, Department of Materials and Ceramic Engineering, University of Aveiro, 3810-193 Aveiro, Portugal

<sup>3</sup>CMTR, ICMPE, UMR 7182 CNRS-UPEC, 2 rue Henri Dunant, F-94320 Thiais, France

<sup>4</sup>Laboratoire de Physique des Matériaux et des Nanomatériaux Appliquée a` l'Environnement, Faculté des Sciences de Gabès Cité Erriadh, Université de Gabès, 6079 Gabès, Tunisia

<sup>5</sup>IM2NP, CNRS, Faculté des Sciences de Saint-Jérôme, Université d'Aix-Marseille, Case 142, 13397 Marseille, France

<sup>6</sup>Institut Néel, CNRS Université J. Fourier, B. P. 166, 38042 Grenoble, France

### Structural properties:

X-ray density ( $\rho_{X\text{-ray}}$ ) of the samples was calculated by considering that a basic unite cell of the cubic spinel structure contain eight ions, using the following equation:<sup>1</sup>

$$\rho_{X\text{-ray}} = \frac{8.M}{N_A.a^3} \quad S1$$

where M is the molecular weight of each compound,  $N_A$  is Avogadro's number, a is the as-calculated lattice parameter converted in cm units and 8 represents the number of molecules in a unit cell of spinel lattice.

The bulk density  $\rho_{th}$  estimated using the following relation:<sup>1</sup>

$$\rho_{th} = \frac{m}{\pi.r^2.h} \quad S2$$

where h is the thickness of the pellet, r is the radius, and m is the mass of pellet .

The apparent porosity, P, in each sample was calculated using the following equation:<sup>1</sup>

$$P(\%) = \frac{\rho^{X-ray} - \rho_{th}}{\rho^{X-ray}} \times 100 \quad S3$$

Assuming all the particles to be spherical, the specific surface area was calculated from the relation:<sup>2</sup>

$$S = \frac{6000}{D_{SC} \cdot \rho^{X-ray}} \quad S4$$

where the constant 6000 is called form factor for spherical particles,  $D_{SC}$  is the diameter of the particle and " $\rho^{X-ray}$ " is the X-ray density.

The theoretical lattice parameter ( $a_{th}$ ) can be calculated using the following equation:<sup>3</sup>

$$a_{th} = \frac{8[r_A + r_o] + \sqrt{3}(r_B + r_o)}{3\sqrt{3}} \quad S5$$

Where,  $r_A = \sum_i C_i r_i$ ,  $r_B = \frac{1}{2} \sum_i C_i r_i$  are the average ionic radii per molecule for the respective A and B-sites; here,  $C_i$  is the concentration of the element i with ionic radius  $r_i$  on a particular site.

The oxygen positional parameter ( $u$ ) can be determined using the relations:<sup>3</sup>

$$u = \left[ (r_A + r_o) \frac{1}{a\sqrt{3}} + 0.25 \right] \quad S6$$

The tetrahedral and octahedral bond lengths ( $d_{AE}$ ) and ( $d_{BE}$ ), tetrahedral edge ( $d_{AL}$ ), shared and unshared octahedral edge ( $d_{BL}$ ) and ( $d_{BEu}$ ), the distance between magnetic ions (i.e. hopping lengths) of A-site ( $L_A$ ) and of B-site ( $L_B$ ) can be evaluated by:<sup>4</sup>

$$d_{AE} = a\sqrt{2} \left( 2u - \frac{1}{2} \right) \quad S7$$

$$d_{AL} = a\sqrt{3} \left( u - \frac{1}{4} \right) \quad S8$$

$$d_{BL} = a\sqrt{3(u)^2 - \frac{11}{4}u + \frac{43}{64}} \quad S9$$

$$d_{BEu} = a\sqrt{4(u)^2 - 3u + \frac{11}{16}} \quad S10$$

$$d_{BE} = a\sqrt{2}(1-2u) \quad S11$$

$$L_A = \frac{a\sqrt{3}}{4} \quad S12$$

$$L_B = \frac{a\sqrt{2}}{4} \quad S13$$

where  $a$  is the lattice parameter experimental.

**Fig. S2** shows the interionic distances and bond angles between ions of spinel ferrites. The bond lengths and bond angles between the cations are calculated by the following relations:<sup>5</sup>

### Me-O distances

$$p = a\left(\frac{5}{8} - u\right) \quad S14 \quad , \quad q = a\sqrt{3}(u - 0.25) \quad S15 \quad , \quad r = a\sqrt{11}(u - 0.25) \quad S16 \quad , \quad s = a\sqrt{3}\left(\frac{1}{3}u + \frac{1}{8}\right) \quad S17$$

### Me-Me distances

$$b = \frac{a\sqrt{2}}{4} \quad S18 \quad , \quad c = \frac{a\sqrt{11}}{8} \quad S19 \quad , \quad d = \frac{a\sqrt{3}}{4} \quad S20 \quad , \quad e = \frac{3a\sqrt{3}}{8} \quad S21 \quad , \quad f = \frac{a\sqrt{6}}{4} \quad S22$$

### Bond angles

$$\cos(\theta_1) = \frac{p^2 + q^2 - c^2}{2pq} \quad S23 \quad , \quad \cos(\theta_2) = \frac{p^2 + r^2 - e^2}{2pr} \quad S24 \quad , \quad \cos(\theta_3) = \frac{p^2 - b^2}{2p^2} \quad S25$$

$$\cos(\theta_4) = \frac{p^2 + s^2 - f^2}{2ps} \quad S26 \quad , \quad \cos(\theta_5) = \frac{r^2 + q^2 - d^2}{2rq} \quad S27$$

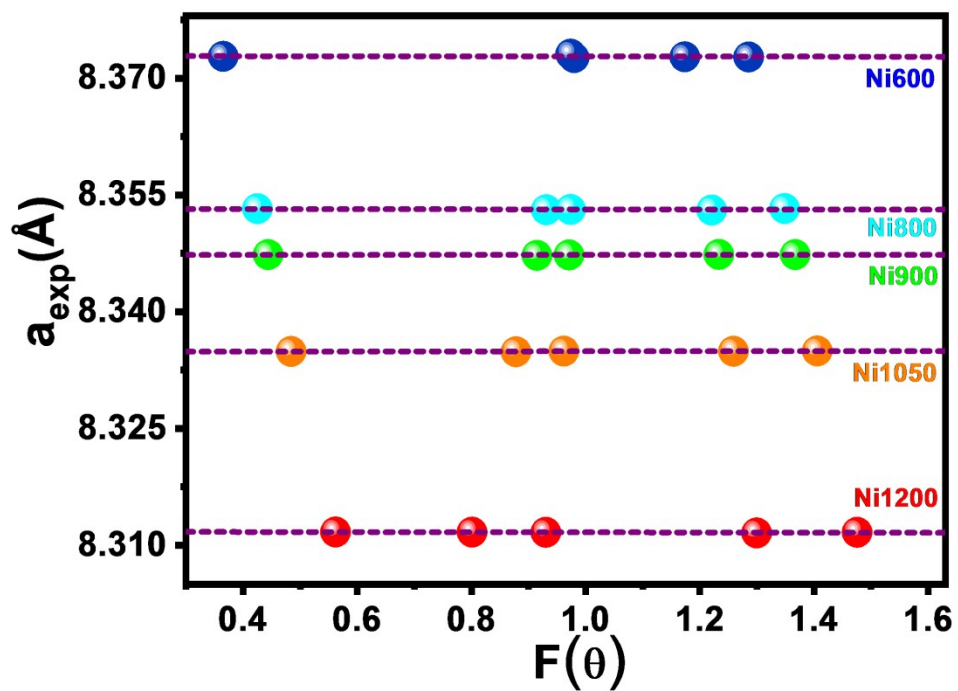

Fig. S1 Lattice constants as function of the Nelson-Riley function  $F(\theta)$  for all samples

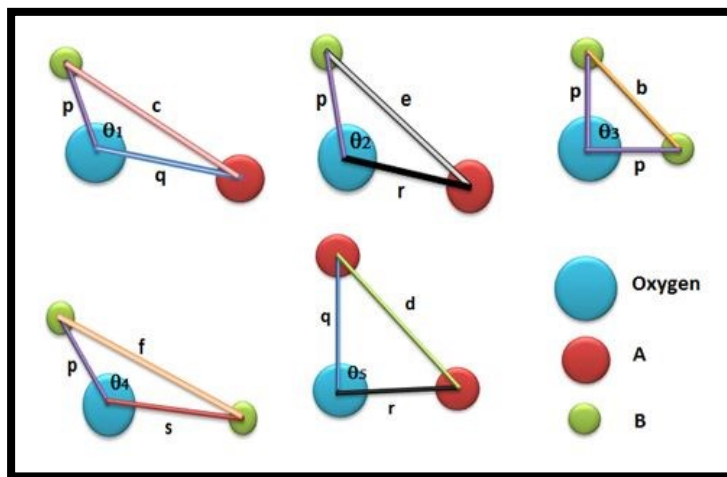

Fig. S2 The interionic distances and bond angles between ions of spinel ferrites

**Table S1** Lattice constants ( $a_{\text{exp}}$ ,  $a_0$ ,  $a_R$  and  $a_{\text{th}}$ ), unit cell volume ( $V$ ), Rietveld refinement parameters, specific surface area ( $S$ ), X-ray density ( $\rho_{\text{X-ray}}$ ), apparent density ( $\rho_{\text{exp}}$ ), porosity ( $P$ ), hopping length ( $L_A$  and  $L_B$ ), mean ionic radii ( $r_A$  and  $r_B$ ), oxygen positional parameter ( $u$ ) tetrahedral bond length ( $d_{\text{AE}}$ ), octahedral bond length ( $d_{\text{BE}}$ ), tetrahedral edge ( $d_{\text{AL}}$ ), shared octahedral edge ( $d_{\text{BL}}$ ) and unshared octahedral edge ( $d_{\text{BEu}}$ ) of NZFAO samples.

| Parameter                                          | Ni600   | Ni800   | Ni900    | Ni1050  | Ni1200  |
|----------------------------------------------------|---------|---------|----------|---------|---------|
| $a_{\text{exp}}(\text{\AA})$                       | 8.368   | 8.338   | 8.325    | 8.307   | 8.278   |
| $a_0(\text{\AA})$                                  | 8.372   | 8.353   | 8.347    | 8.334   | 8.311   |
| $a_R(\text{\AA})$                                  | 8.372   | 8.347   | 8.334    | 8.334   | 8.311   |
| $a_{\text{th}}(\text{\AA})$                        | 8.354   | 8.352   | 8.350    | 8.348   | 8.341   |
| $V(\text{\AA}^3)$                                  | 586.063 | 579.782 | 577.1315 | 573.294 | 567.385 |
| $\chi^2$                                           | 2.49    | 2.10    | 1.29     | 2.07    | 3.00    |
| $R_P$ (%)                                          | 20.9    | 14.7    | 24.9     | 22.0    | 51.8    |
| $R_{\text{wp}}$ (%)                                | 13.1    | 8.45    | 11.1     | 10.4    | 21.8    |
| $R_c$ (%)                                          | 8.26    | 5.82    | 9.71     | 7.23    | 12.6    |
| $S$ ( $\text{m}^2/\text{g}$ )                      | 69.81   | 48.14   | 39.56    | 26.72   | 22.29   |
| $\rho_{\text{X-ray}}(\text{g}\cdot\text{cm}^{-3})$ | 5.046   | 5.100   | 5.124    | 5.158   | 5.212   |
| $\rho_{\text{exp}}(\text{g}\cdot\text{cm}^{-3})$   | 3.234   | 3.284   | 3.334    | 3.358   | 3.408   |
| $P$ (%)                                            | 35.904  | 35.615  | 34.938   | 34.889  | 34.605  |
| $r_A(\text{\AA})$                                  | 0.6668  | 0.6569  | 0.6492   | 0.6404  | 0.6360  |
| $r_B(\text{\AA})$                                  | 0.6341  | 0.6390  | 0.6429   | 0.6473  | 0.6495  |
| $U$                                                | 0.3884  | 0.3882  | 0.3879   | 0.3876  | 0.3874  |
| $L_A(\text{\AA})$                                  | 3.625   | 3.617   | 3.614    | 3.609   | 3.594   |
| $L_B(\text{\AA})$                                  | 2.960   | 2.953   | 2.951    | 2.946   | 2.934   |
| $d_{\text{AE}}(\text{\AA})$                        | 3.275   | 3.259   | 3.247    | 3.233   | 3.225   |
| $d_{\text{BE}}(\text{\AA})$                        | 2.641   | 2.636   | 2.639    | 2.640   | 2.643   |
| $d_{\text{AL}}(\text{\AA})$                        | 2.006   | 1.995   | 1.998    | 1.979   | 1.975   |
| $d_{\text{BL}}(\text{\AA})$                        | 1.986   | 1.980   | 1.979    | 1.997   | 1.977   |
| $d_{\text{BEu}}(\text{\AA})$                       | 2.967   | 2.956   | 2.951    | 2.944   | 2.941   |

**Table S2** Interatomic distance, bond angles, crystallite size observed from XRD ( $D_{SC}$ ) and particle size determined from SEM ( $D_{SEM}$ ), cation distribution of NZFAO samples

| <b>Parameter</b>                 | <b>Ni600</b>                                                                                                         | <b>Ni800</b>                                                                                                         | <b>Ni900</b>                                                                                                         | <b>Ni1050</b>                                                                                                        | <b>Ni1200</b>                                                                                                    |
|----------------------------------|----------------------------------------------------------------------------------------------------------------------|----------------------------------------------------------------------------------------------------------------------|----------------------------------------------------------------------------------------------------------------------|----------------------------------------------------------------------------------------------------------------------|------------------------------------------------------------------------------------------------------------------|
| <b>p (Å)</b>                     | <b>1.9798</b>                                                                                                        | <b>1.9744</b>                                                                                                        | <b>1.9738</b>                                                                                                        | <b>1.9721</b>                                                                                                        | <b>1.9720</b>                                                                                                    |
| <b>q (Å)</b>                     | <b>2.0060</b>                                                                                                        | <b>1.9958</b>                                                                                                        | <b>1.9884</b>                                                                                                        | <b>1.9798</b>                                                                                                        | <b>1.9752</b>                                                                                                    |
| <b>r (Å)</b>                     | <b>3.8410</b>                                                                                                        | <b>3.8217</b>                                                                                                        | <b>3.8075</b>                                                                                                        | <b>3.7910</b>                                                                                                        | <b>3.7823</b>                                                                                                    |
| <b>s (Å)</b>                     | <b>3.6881</b>                                                                                                        | <b>3.6740</b>                                                                                                        | <b>3.6668</b>                                                                                                        | <b>3.6574</b>                                                                                                        | <b>3.6534</b>                                                                                                    |
| <b>b (Å)</b>                     | <b>2.9585</b>                                                                                                        | <b>2.9479</b>                                                                                                        | <b>2.9433</b>                                                                                                        | <b>2.9369</b>                                                                                                        | <b>2.9344</b>                                                                                                    |
| <b>c (Å)</b>                     | <b>3.4691</b>                                                                                                        | <b>3.4567</b>                                                                                                        | <b>3.4513</b>                                                                                                        | <b>3.4439</b>                                                                                                        | <b>3.4409</b>                                                                                                    |
| <b>d (Å)</b>                     | <b>3.6234</b>                                                                                                        | <b>3.6104</b>                                                                                                        | <b>3.6048</b>                                                                                                        | <b>3.5970</b>                                                                                                        | <b>3.5940</b>                                                                                                    |
| <b>e (Å)</b>                     | <b>5.4351</b>                                                                                                        | <b>5.4156</b>                                                                                                        | <b>5.4072</b>                                                                                                        | <b>5.3955</b>                                                                                                        | <b>5.3910</b>                                                                                                    |
| <b>f (Å)</b>                     | <b>5.1243</b>                                                                                                        | <b>5.1059</b>                                                                                                        | <b>5.0980</b>                                                                                                        | <b>5.0869</b>                                                                                                        | <b>5.0826</b>                                                                                                    |
| <b><math>\theta_1</math> (°)</b> | <b>121.00</b>                                                                                                        | <b>121.07</b>                                                                                                        | <b>121.16</b>                                                                                                        | <b>121.25</b>                                                                                                        | <b>121.32</b>                                                                                                    |
| <b><math>\theta_2</math> (°)</b> | <b>135.61</b>                                                                                                        | <b>135.83</b>                                                                                                        | <b>136.18</b>                                                                                                        | <b>136.52</b>                                                                                                        | <b>136.76</b>                                                                                                    |
| <b><math>\theta_3</math> (°)</b> | <b>128.06</b>                                                                                                        | <b>127.92</b>                                                                                                        | <b>127.72</b>                                                                                                        | <b>127.5</b>                                                                                                         | <b>127.38</b>                                                                                                    |
| <b><math>\theta_4</math> (°)</b> | <b>126.74</b>                                                                                                        | <b>126.71</b>                                                                                                        | <b>126.68</b>                                                                                                        | <b>126.64</b>                                                                                                        | <b>126.62</b>                                                                                                    |
| <b><math>\theta_5</math> (°)</b> | <b>68.49</b>                                                                                                         | <b>68.65</b>                                                                                                         | <b>68.87</b>                                                                                                         | <b>69.1</b>                                                                                                          | <b>69.26</b>                                                                                                     |
| <b><math>D_{SC}</math>(nm)</b>   | <b>17</b>                                                                                                            | <b>24.5</b>                                                                                                          | <b>29.8</b>                                                                                                          | <b>43.9</b>                                                                                                          | <b>52.2</b>                                                                                                      |
| <b><math>D_{SEM}</math> (nm)</b> | <b>13.6</b>                                                                                                          | <b>22.28</b>                                                                                                         | <b>37.62</b>                                                                                                         | <b>180</b>                                                                                                           | <b>4620</b>                                                                                                      |
| <b>Cation distribution</b>       | <b>(Zn<sub>0.4</sub>Al<sub>0.12</sub>Fe<sub>0.48</sub>)<br/>[Ni<sub>0.6</sub>Al<sub>0.38</sub>Fe<sub>1.02</sub>]</b> | <b>(Zn<sub>0.4</sub>Al<sub>0.21</sub>Fe<sub>0.39</sub>)<br/>[Ni<sub>0.6</sub>Al<sub>0.29</sub>Fe<sub>1.11</sub>]</b> | <b>(Zn<sub>0.4</sub>Al<sub>0.28</sub>Fe<sub>0.32</sub>)<br/>[Ni<sub>0.6</sub>Al<sub>0.22</sub>Fe<sub>1.18</sub>]</b> | <b>(Zn<sub>0.4</sub>Al<sub>0.36</sub>Fe<sub>0.24</sub>)<br/>[Ni<sub>0.6</sub>Al<sub>0.14</sub>Fe<sub>1.26</sub>]</b> | <b>(Zn<sub>0.4</sub>Al<sub>0.4</sub>Fe<sub>0.2</sub>)<br/>[Ni<sub>0.6</sub>Al<sub>0.1</sub>Fe<sub>1.3</sub>]</b> |

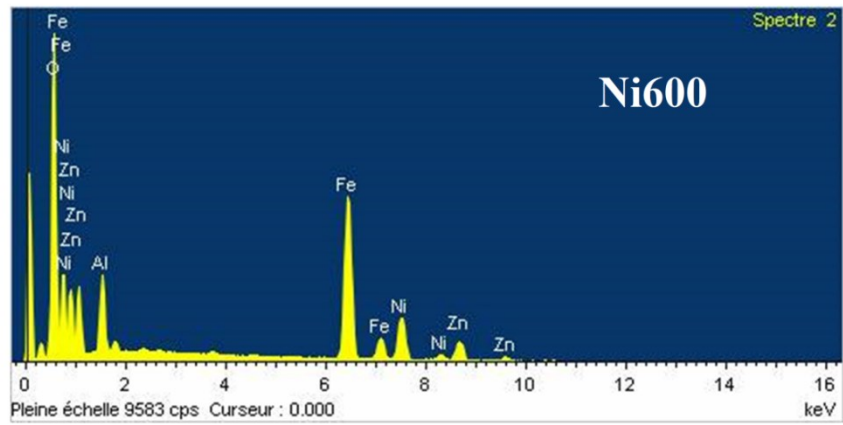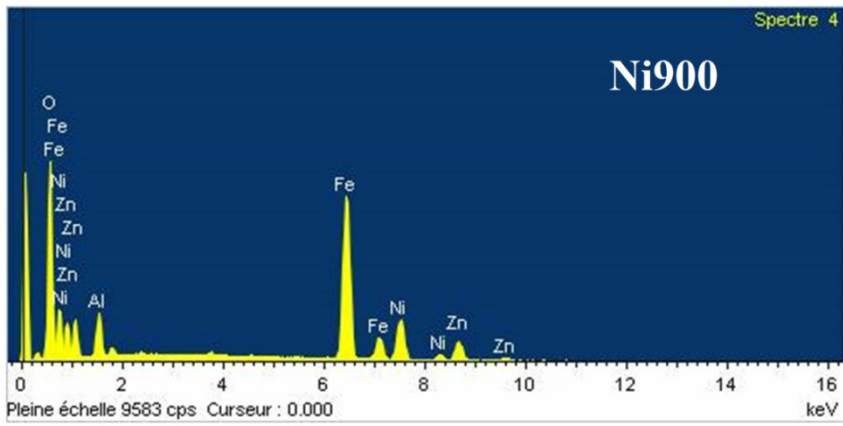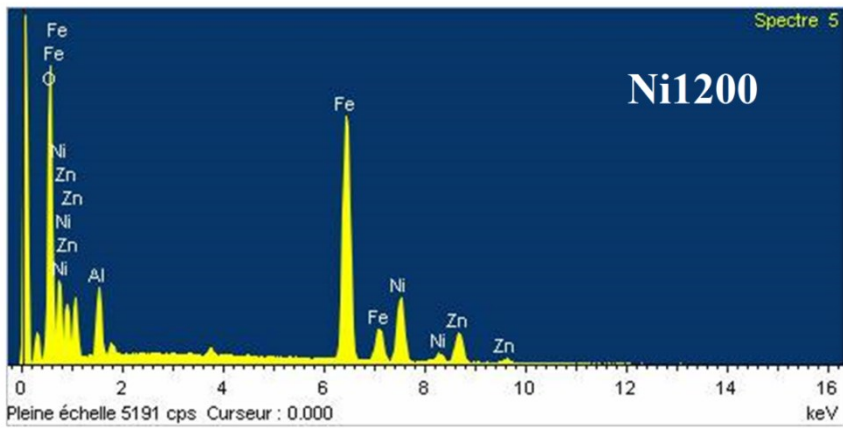

**Fig. S3** EDS analysis of Ni600, Ni900 and Ni1200 samples

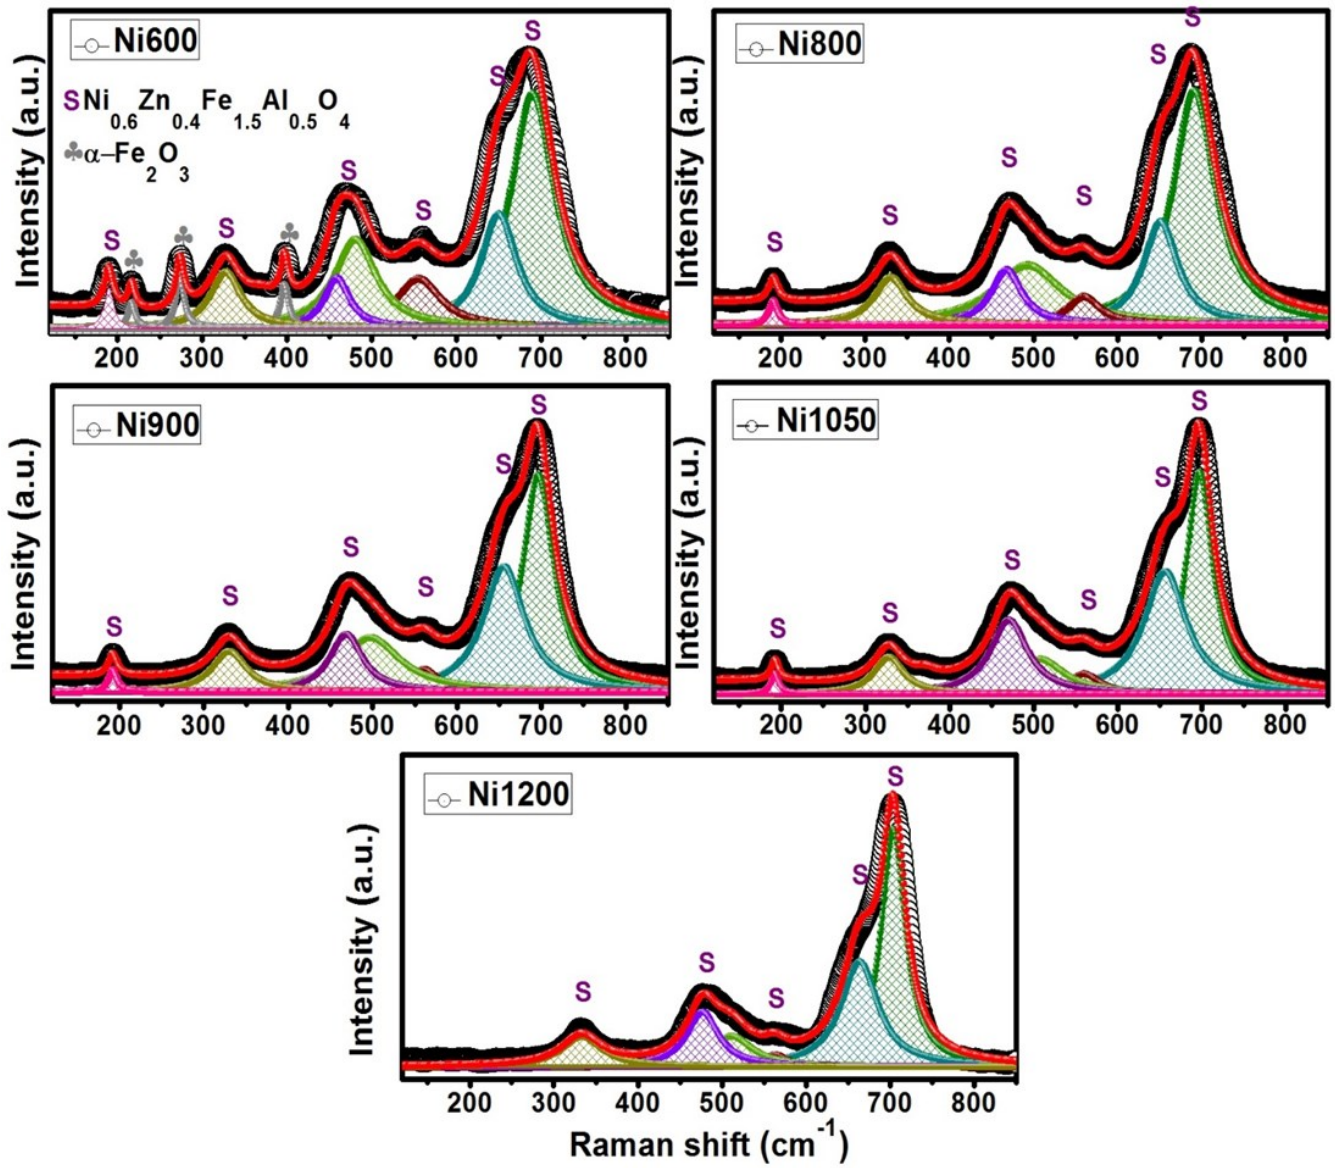

Fig. S4 Deconvoluted Raman spectra at 300 K of NZFAO samples annealed at different temperature fitted with the Lorentzian function.



**Table S3** Raman band position and force constants of the tetrahedral and octahedral sites of different samples

| Sample | Raman band position (cm <sup>-1</sup> ) |                    |                    |                    |        |                    | Force constants (N/m) |                |
|--------|-----------------------------------------|--------------------|--------------------|--------------------|--------|--------------------|-----------------------|----------------|
|        | A1g <sup>(1)</sup>                      | A1g <sup>(2)</sup> | F2g <sup>(3)</sup> | F2g <sup>(2)</sup> | Eg     | F2g <sup>(1)</sup> | F <sub>T</sub>        | F <sub>O</sub> |
| Ni600  | 690.22                                  | 650.15             | 555.69             | 481.04             | 327.94 | 189.76             | 203.95                | 116.94         |
| Ni800  | 691.54                                  | 651.36             | 493.52             | 468.38             | 330.83 | 191.33             | 195.29                | 122.03         |
| Ni900  | 696.80                                  | 656.13             | 469.11             | 469.11             | 330.46 | 192.34             | 190.81                | 124.09         |
| Ni1050 | 697.893                                 | 657.04             | 560.49             | 471.39             | 328.33 | 192.96             | 182.86                | 125.14         |
| Ni1200 | 703.90                                  | 663.86             | 563.63             | 477.27             | 333.57 | ---                | 181.67                | 130.52         |

**Table S4** Band position ( $\nu$ ), threshold energy ( $E_{th}$ ), force constant ( $K$ ), elastic parameters and Debye temperature ( $\theta$ ) of the annealed NZAFO samples determined from FTIR spectra recorded at 300 K.

| <b>Parameter</b>               | <b>Ni600</b> | <b>Ni800</b> | <b>Ni900</b> | <b>Ni1050</b> | <b>Ni1200</b> |
|--------------------------------|--------------|--------------|--------------|---------------|---------------|
| $\nu_A$ (cm <sup>-1</sup> )    | 557.8        | 565.1        | 571.7        | 576.2         | 581.4         |
| $\nu_B$ (cm <sup>-1</sup> )    | 403.6        | 406.7        | 407.5        | 407.5         | 409.8         |
| $\nu_{av}$ (cm <sup>-1</sup> ) | 480.7        | 485.9        | 489.6        | 491.8         | 495.6         |
| $\nu_{th}$ (cm <sup>-1</sup> ) | 670.1        | 712.6        | 718.4        | 719           | 724.7         |
| $E_{th} \times 10^{-2}$ (eV)   | 8.28         | 8.80         | 8.87         | 8.88          | 8.95          |
| $K_T$ (N/m)                    | 133.2        | 130.0        | 128.4        | 124.6         | 123.9         |
| $K_O$ (N/m)                    | 177.1        | 184.4        | 188.7        | 192.8         | 197.0         |
| $K_{av}$ (N/m)                 | 155.1        | 157.2        | 158.5        | 158.7         | 160.4         |
| $C_{11}$ (GPa)                 | 185.3        | 188.5        | 190.4        | 191.0         | 193.7         |
| $B$ (GPa)                      | 185.3        | 188.5        | 190.4        | 191.0         | 193.7         |
| $\nu_l$ (m/s)                  | 6059.8       | 6079.5       | 6095.7       | 6085.2        | 6096.2        |
| $\nu_s$ (m/s)                  | 3498.6       | 3510.0       | 3519.3       | 3513.3        | 3519.6        |
| $\nu_m$ (m/s)                  | 3884.1       | 3896.7       | 3907.0       | 3900.4        | 3907.4        |
| $G$ (GPa)                      | 61.7         | 62.8         | 63.4         | 63.7          | 64.5          |
| $\sigma$                       | 0.35         | 0.35         | 0.35         | 0.35          | 0.35          |
| $E$ (GPa)                      | 166.6        | 169.6        | 171.2        | 172.0         | 174.1         |
| $\theta_D$ (K)                 | 691.2        | 698.7        | 704          | 707.2         | 712.7         |
| $\theta_E$ (K)                 | 529.0        | 532.6        | 534.9        | 535.1         | 538           |

**Table S5** Elastic data corrected to zero porosity for the annealed NZFAO samples.

| <b>Model</b>                     | <b>Parameter</b> | <b>Ni600</b> | <b>Ni800</b> | <b>Ni900</b> | <b>Ni1050</b> | <b>Ni1200</b> |
|----------------------------------|------------------|--------------|--------------|--------------|---------------|---------------|
| <b>Elastic theory</b>            | $\sigma_0$       | 0.478        | 0.477        | 0.474        | 0.474         | 0.472         |
|                                  | $G_0$ (GPa)      | 153.6        | 154.5        | 151.8        | 152.2         | 152.4         |
|                                  | $E_0$ (GPa)      | 526.4        | 526.2        | 509.7        | 510.6         | 508.2         |
|                                  | $v_{s0}$ (m/s)   | 3947.2       | 3982.8       | 3983.2       | 3975.6        | 3978.5        |
|                                  | $v_{l0}$ (m/s)   | 11023.9      | 10995.1      | 10875.8      | 10846.5       | 10804.6       |
|                                  | $v_{m0}$ (m/s)   | 4484.4       | 4523.6       | 4522.9       | 4514.2        | 4516.9        |
|                                  | $C_1$            | 1.2542       | 1.2553       | 1.2580       | 1.2582        | 1.2593        |
|                                  | $C_e$            | 1.9038       | 1.9029       | 1.9009       | 1.9008        | 1.8999        |
| $C_\sigma$                       | 0.75             | 0.75         | 0.75         | 0.75         | 0.75          |               |
| <b>Ledbetter and Datta model</b> | $A_1$            | 1.7092       | 1.7169       | 1.7349       | 1.7362        | 1.7438        |
|                                  | $A_2$            | 169.695      | 174.299      | 180.486      | 180.960       | 185.75        |
|                                  | $A_3$            | -46613.7     | -48161.5     | -48866,5     | -49234,6      | -50451,23     |
|                                  | $E_0$ (GPa)      | 357.1        | 354.0        | 352.2        | 353.4         | 355.6         |
|                                  | $G_0$ (GPa)      | 125.6        | 124.2        | 123.7        | 124.16        | 124.97        |
|                                  | $B_0$ (GPa)      | 760.4        | 790.2        | 769.9        | 768.4         | 769.7         |
|                                  | $B_0/ G_0$       | 6.05         | 6.36         | 6.22         | 6.18          | 6.37          |

**Table S6** Thermodynamic parameters (lattice energy ( $U_L$ ), shortest wave ( $\sigma_{\max}$ ), high frequency cutoff ( $f_{\max}$ ), approximate mean elastic wave ( $v_{\max}$ ), molar heat capacity at constant volume ( $C_V$ ), Debye temperature ( $\theta_D$ ), and minimum lattice thermal conductivity ( $\Pi_{\min}$ )) of the annealed NZAFO samples.

| <b>Parameter</b>                                    | <b>Ni600</b> | <b>Ni800</b> | <b>Ni900</b> | <b>Ni1050</b> | <b>Ni1200</b> |
|-----------------------------------------------------|--------------|--------------|--------------|---------------|---------------|
| $U_L$ (eV)                                          | -139.1       | -141.5       | -141.5       | -141.0        | -141.1        |
| $\sigma_{\max} \times 10^7$ (m <sup>-1</sup> )      | 2.473        | 2.482        | 2.486        | 2.491         | 2.500         |
| $f_{\max} \times 10^{11}$ (s <sup>-1</sup> )        | 1.580        | 1.598        | 1.610        | 1.619         | 1.633         |
| $v_{\max}$ (cm <sup>-1</sup> )                      | 528.7        | 534.6        | 538.6        | 541.7         | 546.4         |
| $\theta_D$ (K)                                      | 760.2        | 768.8        | 774.5        | 779.0         | 785.7         |
| $C_V$ (J.mol <sup>-1</sup> .K <sup>-1</sup> )       | 104.9        | 103.7        | 102.9        | 102.4         | 101.5         |
| $\Pi_{\min}$ (W.cm <sup>-1</sup> .s <sup>-1</sup> ) | 1.041        | 1.050        | 1.054        | 1.057         | 1.061         |

**Table S7** Energy band gap ( $E_g$ ), Urbach energy ( $E_u$ ), refractive index ( $n_o$ ), and high-frequency dielectric constant ( $\epsilon_a$ ) of Ni-Zn-Al ferrite samples.

| Sample | $E_g$ | $E_u$ | $n_o$ | $\epsilon_a$ |
|--------|-------|-------|-------|--------------|
| Ni600  | 4.5   | 0.7   | 2.19  | 4.80         |
| Ni800  | 3.75  | 0.25  | 2.29  | 5.26         |
| Ni900  | 3.67  | 0.22  | 2.30  | 5.32         |
| Ni1050 | 3.56  | 0.18  | 2.32  | 5.40         |
| Ni1200 | 3.1   | 0.11  | 2.39  | 5.73         |

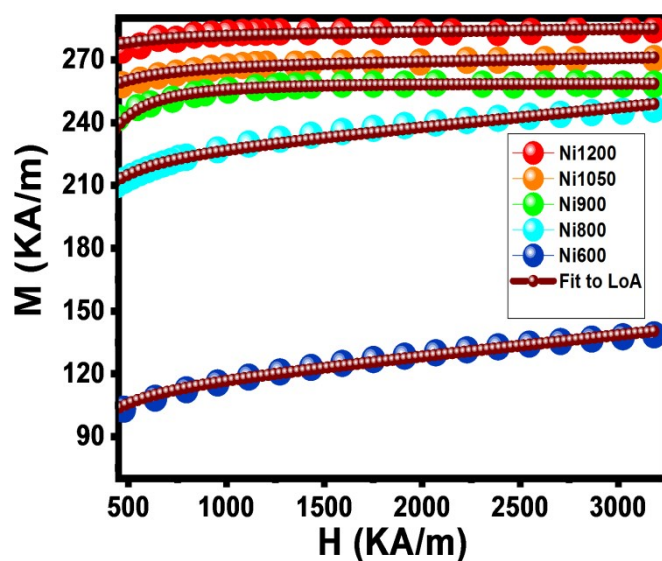

**Fig. S5** Room temperature hysteresis loops of NZAFO ferrites annealed at 600, 800, 900, 1050 and 1200 °C.

**Table S8** ESR parameters of the annealed NZAFO samples at 300 K

| Parameter                              | Ni600   | Ni800   | Ni900   | Ni1050  | Ni1200  |
|----------------------------------------|---------|---------|---------|---------|---------|
| $\Delta_{H_{pp}}$ (Oe)                 | 813.52  | 767.72  | 671.95  | 547.84  | 457.6   |
| $H_r$ (Oe)                             | 2405.02 | 2670.09 | 2757.15 | 2852.04 | 2993.43 |
| G                                      | 2.762   | 2.488   | 2.409   | 2.329   | 2.219   |
| $T_2 \cdot 10^{-11}$ (s)               | 2.919   | 3.434   | 4.052   | 5.141   | 6.459   |
| $T_1 \cdot 10^{-12}$ (s)               | 2.510   | 2.133   | 1.808   | 1.425   | 1.134   |
| $R_1 \cdot 10^{11}$ (s <sup>-1</sup> ) | 3.983   | 4.686   | 5.528   | 7.014   | 8.814   |
| $R_2 \cdot 10^{10}$ (s <sup>-1</sup> ) | 3.425   | 2.911   | 2.467   | 1.945   | 1.548   |
| $R_2/R_1$                              | 0.085   | 0.062   | 0.044   | 0.027   | 0.017   |

**Table S9** Molar volume ( $V_{mat}$ ), saturation magnetization ( $M_s$ ) in (A/m) at 300 K, average particle size ( $D_{SEM}$ ) obtained from SEM images, and transverse relaxivity ( $r_2$ ) of the NZAFO annealed at 600, 800, and 900 °C samples

| Sample | Parameter                                     |             |                             |                  |
|--------|-----------------------------------------------|-------------|-----------------------------|------------------|
|        | $V_{mat} \cdot 10^{-5}$ (m <sup>3</sup> /mol) | $M_s$ (A/m) | $D_{SEM} \cdot 10^{-8}$ (m) | $r_2$ (L/s.mmol) |
| Ni600  | 4.4116                                        | 109200      | 1.36                        | 1.37977          |
| Ni800  | 4.36442                                       | 220400      | 2.228                       | 14.92308         |
| Ni900  | 4.34446                                       | 259140      | 3.762                       | 58.54921         |

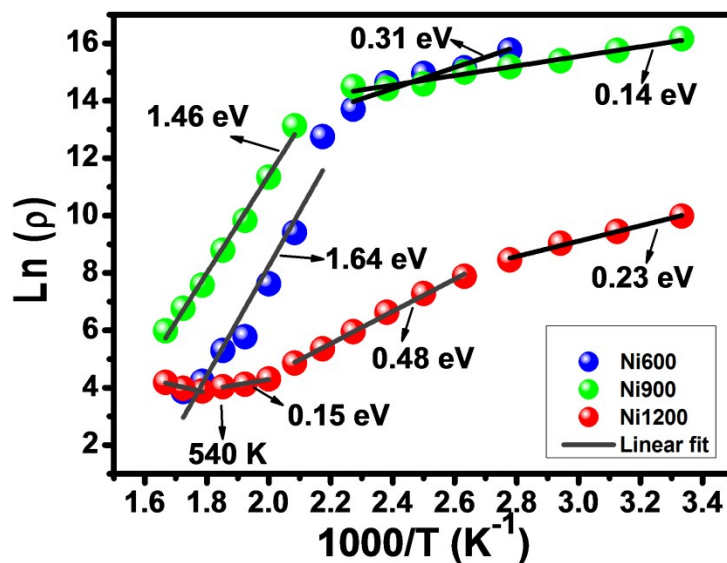

Fig. S6  $\text{Ln}(\rho)$  vs  $1000/T$  for NZAFO ferrites annealed at 600, 900 and 1200 °C.

## Reference

- 1I. H. Gul, F. Amin, A. Z. Abbasi, M. Anis-ur-Rehman, F. A. Maqsood, *Scr. Mater*, 2007, **56**, 497–500.
- 2L. Aswaghosh, D. Manoharanb and N. Victor Jayaa, *Phys. Chem. Chem. Phys*, 2016,**18**, 5995-6004.
- 3 K.E. Siokafus, J.M. Wills, N.W. Grimes, *J. Am. Ceram. Soc*, 1999, **82**, 3279.
- 4G. Kumar, R. K. Kotnala, J. Shah, V. Kumar, A. Kumar, P. Dhimana and M. Singhd., *Phys. Chem. Chem. Phys*, 2017, **19**, 16669-16680.
- 5 W .Zhang, A. Sun, X. Pan, Y. Han, X. Zhao, L. Yu, Z. Zuo and N. Suo, *J. Magn. Magn. Mater*, 2020, **506** 166623.
